# Supplementary material
Source: Springer Nature journal article supplement (https://www.springermedizin.de/resource/supplementary/12889_2012_4394_MOESM1_ESM.pdf/9492404)
Supplement: MOESM1 [file 9492404]

All men aged 40 years and living in the north-east of Helsinki were invited  
n=715

No response  
n=481

Risk assessment of Participant at Health Centre by nurses  
n=234

missing data  
n=38

Complete data; analyses performed  
n=196

CVD score  $\geq 4.5$   
n=67

FINDRISC  $\geq 7$   
n=82

CVD score  $\geq 4.5$  and FINDRISC  $\geq 7$   
n=40
